# Supplementary material for: Antenna effect enhanced ECL immunoassay using microfloral europium porphyrin coordination polymers based on Eu3+ and TCPP for the detection of chloramphenicol in foods
Source: Royal Society of Chemistry journal article supplement (doi:10.1039/d4an00760c), 2024-01-01
Supplement: d4an00760c1.pdf [file d4an00760c1.pdf]

## Supplementary Material

### **Antenna effect enhanced ECL immunoassay using microfloral europium porphyrin coordination polymers based on $\text{Eu}^{3+}$ and TCPP for the detection of chloramphenicol in foods**

Xinyue Qian<sup>a</sup>, Cheng Tan<sup>a</sup>, Jing Zhang<sup>c</sup>, Kang Wu<sup>b,\*</sup>, Anping Deng<sup>a,\*</sup>, Jianguo Li<sup>a,\*</sup>

<sup>a</sup>The Key Lab of Health Chemistry & Molecular Diagnosis of Suzhou, College of Chemistry, Chemical Engineering & Materials Science, Soochow University, Suzhou 215123, P.R. China

<sup>b</sup>School of Biology & Basic Medical Science, Soochow University, Suzhou 215123, P.R. China

<sup>c</sup>Shanghai Animal Disease Control Center, Shanghai 201103, P.R. China

---

\* Correspondence authors: J.G. Li, Telephone: +86 51265882195, Fax: +86 51265882195, E-mail address: lijgsd@suda.edu.cn; A.P. Deng, Telephone: +86 51265882362, Fax: +86 51265882362, E-mail address: danganping@suda.edu.cn; K. Wu, Phone: +86 51265880178, Fax: +86 51265880178, E-mail address: wukang650202@163.com.

## Buffer solution

Phosphate-buffered saline stock solution (PBS, pH = 7.4, 0.1 mol L<sup>-1</sup>) was prepared by KCl (0.1 mol L<sup>-1</sup>), NaCl (0.1 mol L<sup>-1</sup>), Na<sub>2</sub>HPO<sub>4</sub> (6.4 mmol L<sup>-1</sup>) and KH<sub>2</sub>PO<sub>4</sub> (1.0 mmol L<sup>-1</sup>). ECL detection buffer was prepared by PBS containing 0.1 mol L<sup>-1</sup> K<sub>2</sub>S<sub>2</sub>O<sub>8</sub>. The solution to activate bare GCE was prepared by 5.0 mmol L<sup>-1</sup> K<sub>3</sub>[Fe (CN)<sub>6</sub>], 5.0 mmol L<sup>-1</sup> K<sub>4</sub>[Fe (CN)<sub>6</sub>] and 0.1 mol L<sup>-1</sup> KCl. All aqueous solutions were prepared with sub-boiling doubly distilled water.

## Preparation of SnS<sub>2</sub> NSs

SnS<sub>2</sub> NSs were synthesized with reference to existing methods and with some modifications.<sup>1</sup> Add 0.35 g SnCl<sub>4</sub>·5H<sub>2</sub>O into 30 mL of DI water to form a transparent solution under magnetic stirring, then add 0.4 g thiourea and stir well. Subsequently, the solution was transferred into a 50 mL autoclave and maintained at 180 °C for 24 h. After the reaction, the precipitate was centrifuged and washed three times each with deionized water and ethanol. Eventually, the product was dried under vacuum at 60 °C overnight to obtain a yellow powder for future use.

## Characterization of Eu-PCP

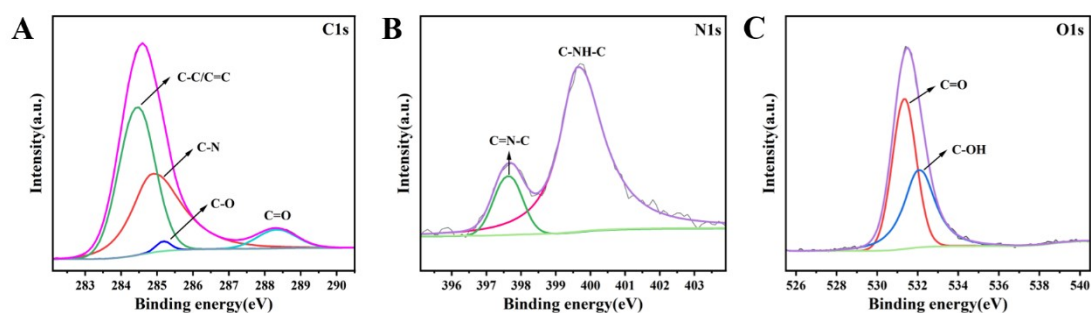

Fig. S1. High-resolution XPS spectra of Eu-PCP (A) C1s, (B) O1s and (C) N1s.

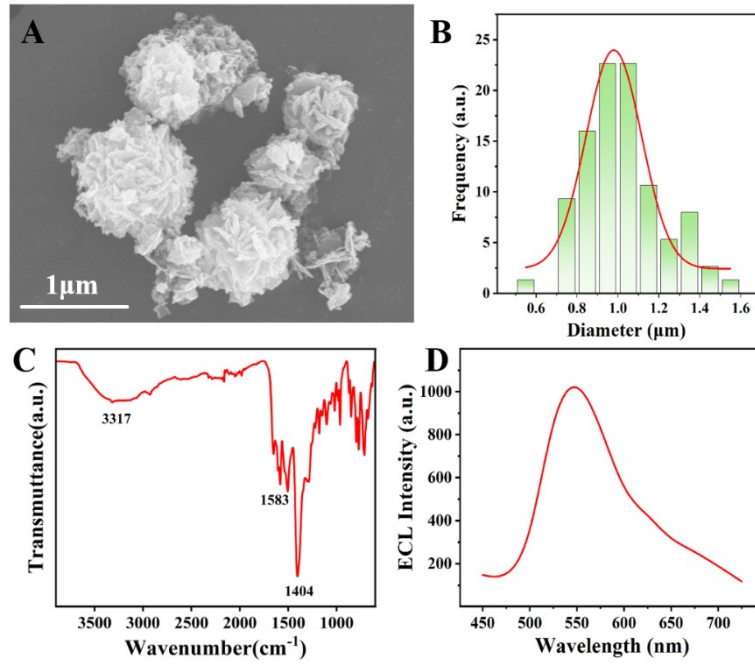

**Fig. S2.** SEM image of Eu-PCP (A). DLS test result for Eu-PCP (B). FT-IR spectrum of Eu-PCP (C). ECL emission spectrum of Eu-PCP (D).

### Characterization of Au@SnS<sub>2</sub>

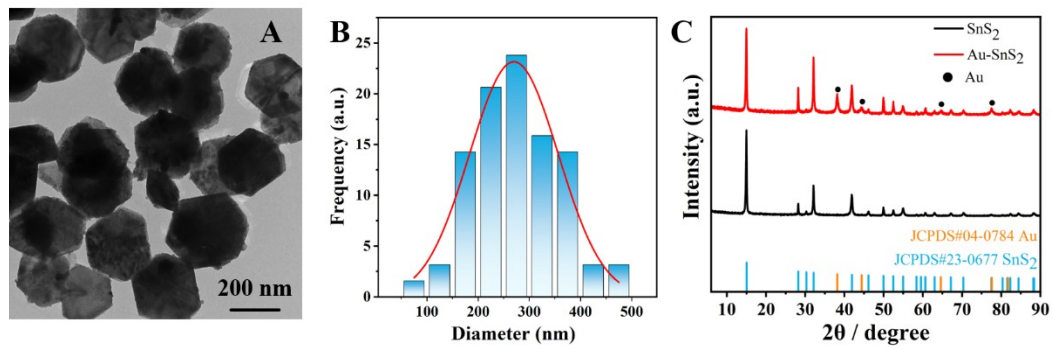

**Fig. S3.** TEM image of SnS<sub>2</sub> NSs (A). DLS test result for SnS<sub>2</sub> NSs (B). XRD pattern of Au@SnS<sub>2</sub> NSs (C).

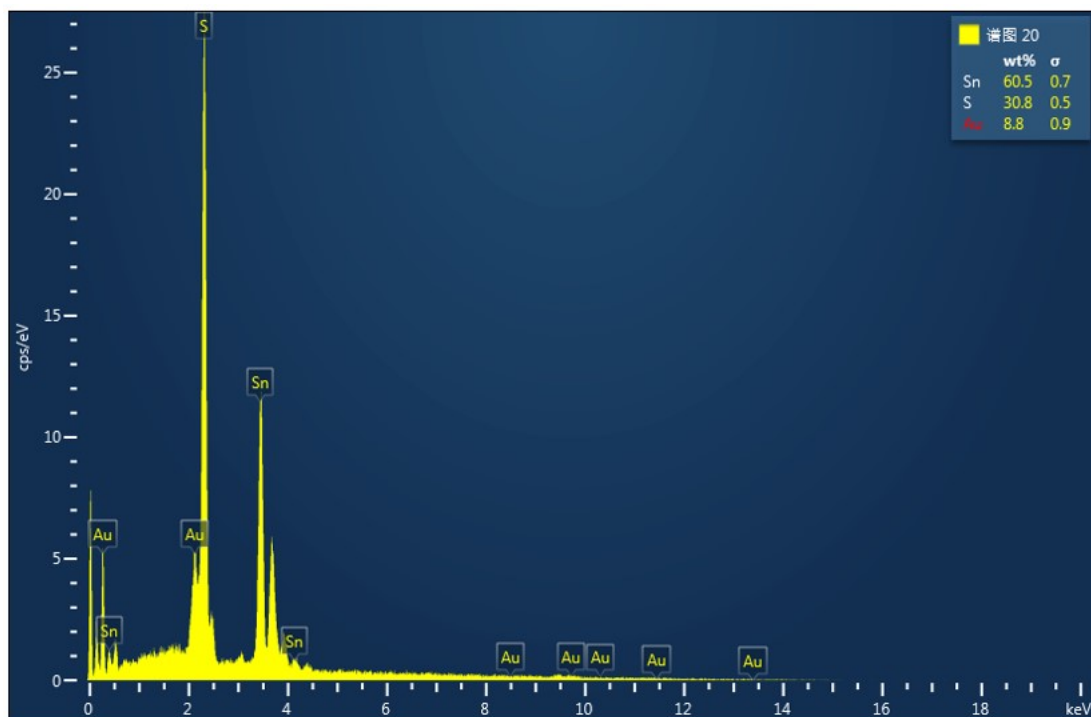

**Fig. S4.** EDS spectrum of Au@SnS<sub>2</sub> NSs.

### Characterization of Zn-PCP, Cu-PCP, Fe-PCP

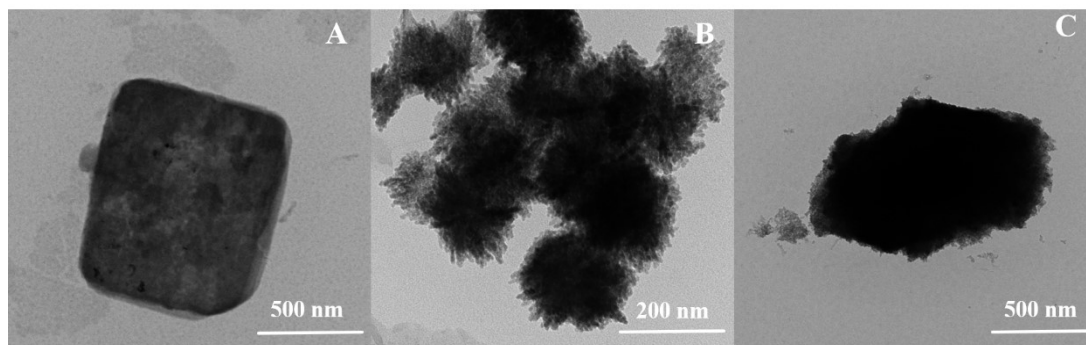

**Fig. S5.** TEM image of Zn-PCP (A), Cu-PCP (B), Fe-PCP (C).

## Molecular structural formulae

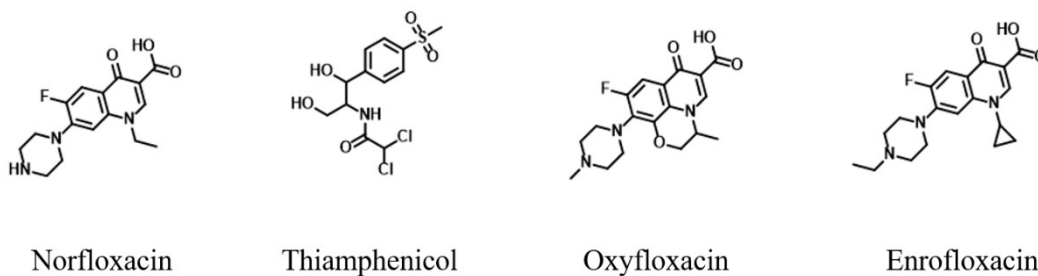

**Fig. S6.** Molecular structural formulae of Norfloxacin, Thiamphenicol, Ofloxacin and Enrofloxacin

## Reproducibility of five immunosensors

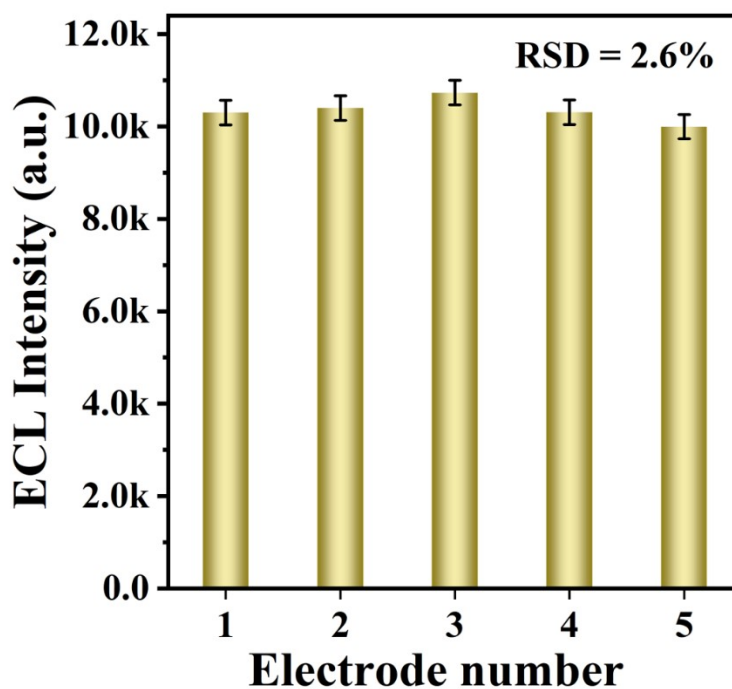

**Fig. S7.** Reproducibility of five immunosensors under the same conditions at a detector concentration of  $0.01\text{ng mL}^{-1}$ .

**Table S1****Table S1** Properties of comparable methods for the determination of CAP

| Methods    | LODs                     | Analytical ranges                | References |
|------------|--------------------------|----------------------------------|------------|
| HPLC-MS/MS | 15.5 pg mL <sup>-1</sup> | 0.01 - 5 ng mL <sup>-1</sup>     | 2          |
| SERS       | 0.87 pg mL <sup>-1</sup> | 0.01 - 1000 ng mL <sup>-1</sup>  | 3          |
| ELISA      | 0.1 ng mL <sup>-1</sup>  | 0.18 - 6.37 ng mL <sup>-1</sup>  | 4          |
| LFIA       | 3 ng mL <sup>-1</sup>    | 0.1 - 1.5 ng mL <sup>-1</sup>    | 5          |
| ECLIA      | 3.1 pg mL <sup>-1</sup>  | 0.01 - 100 ng mL <sup>-1</sup>   | 6          |
| ECLIA      | 0.09 pg mL <sup>-1</sup> | 0.0002 - 500 ng mL <sup>-1</sup> | This work  |

## References

1. M. Zhou, Y. Pu, Q. Wu, P. Wang, T. Liu and M. Zhang, *Sensor. Actuat. B-Chem.*, 2020, **319**, 128298.
2. H. Ye, S. Li, Y. Xi, Y. Shi, X. Shang and D. Huang, *Antibiotics*, 2022, **11**, 1427.
3. J. Chen, H. Lin, L. Cao, J. Sui, L. Wang, X. Fang and K. Wang, *Spectrochim. Acta. A*, 2023, **303**, 123211.
4. N. Liu, S. Song, L. Lu, D. Nie, Z. Han, X. Yang, Z. Zhao, A. Wu and X. Zheng, *Food Agric. Immunol.*, 2014, **25**, 523–534.
5. Q. Han, L. Fan, X. Liu, Y. Tang, P. Wang, Z. Shu, W. Zhang and L. Zhu, *Molecules*, 2023, **28**, 7496.
6. P. Li, J. Yu, K. Zhao, A. Deng and J. Li, *Biosens. Bioelectron.*, 2020, **147**, 111790.
